# Supplementary material
Source: publisher site journal article supplement (https://www.dovepress.com/article/290466)
Supplement: Supplementary file 1 [file get_supplementary_file.php]

**Preparation, Characterization, Pharmacokinetic, and Therapeutic Potential of Novel 6-Mercaptopurine-loaded Oral Nanomedicines for Acute Lymphoblastic Leukemia**

Yaru Zou1,2,#, Dong Mei1,#, Jinjie Yuan1,2, Jiaqi Han1, Jiamin Xu1, Ning Sun1, Huan He1, Changqing Yang2, Libo Zhao1*

1 Clinical Research Center, Beijing Children’s Hospital, Capital Medical University, National Center for Children’s Health, Beijing, 100045, China

2 School of Basic Medicine and Clinical Pharmacy, China Pharmaceutical University, Nanjing, 211198, China

*Corresponding author at: Clinical Research Center, Beijing Children’s Hospital, Capital Medical University, National Center for Children’s Health, Beijing.

Tel:+86-010-596170180.

E-mail addresses: libozhao2011@163.com.

#These authors contributed equally to this work and should be considered as co-first authors.


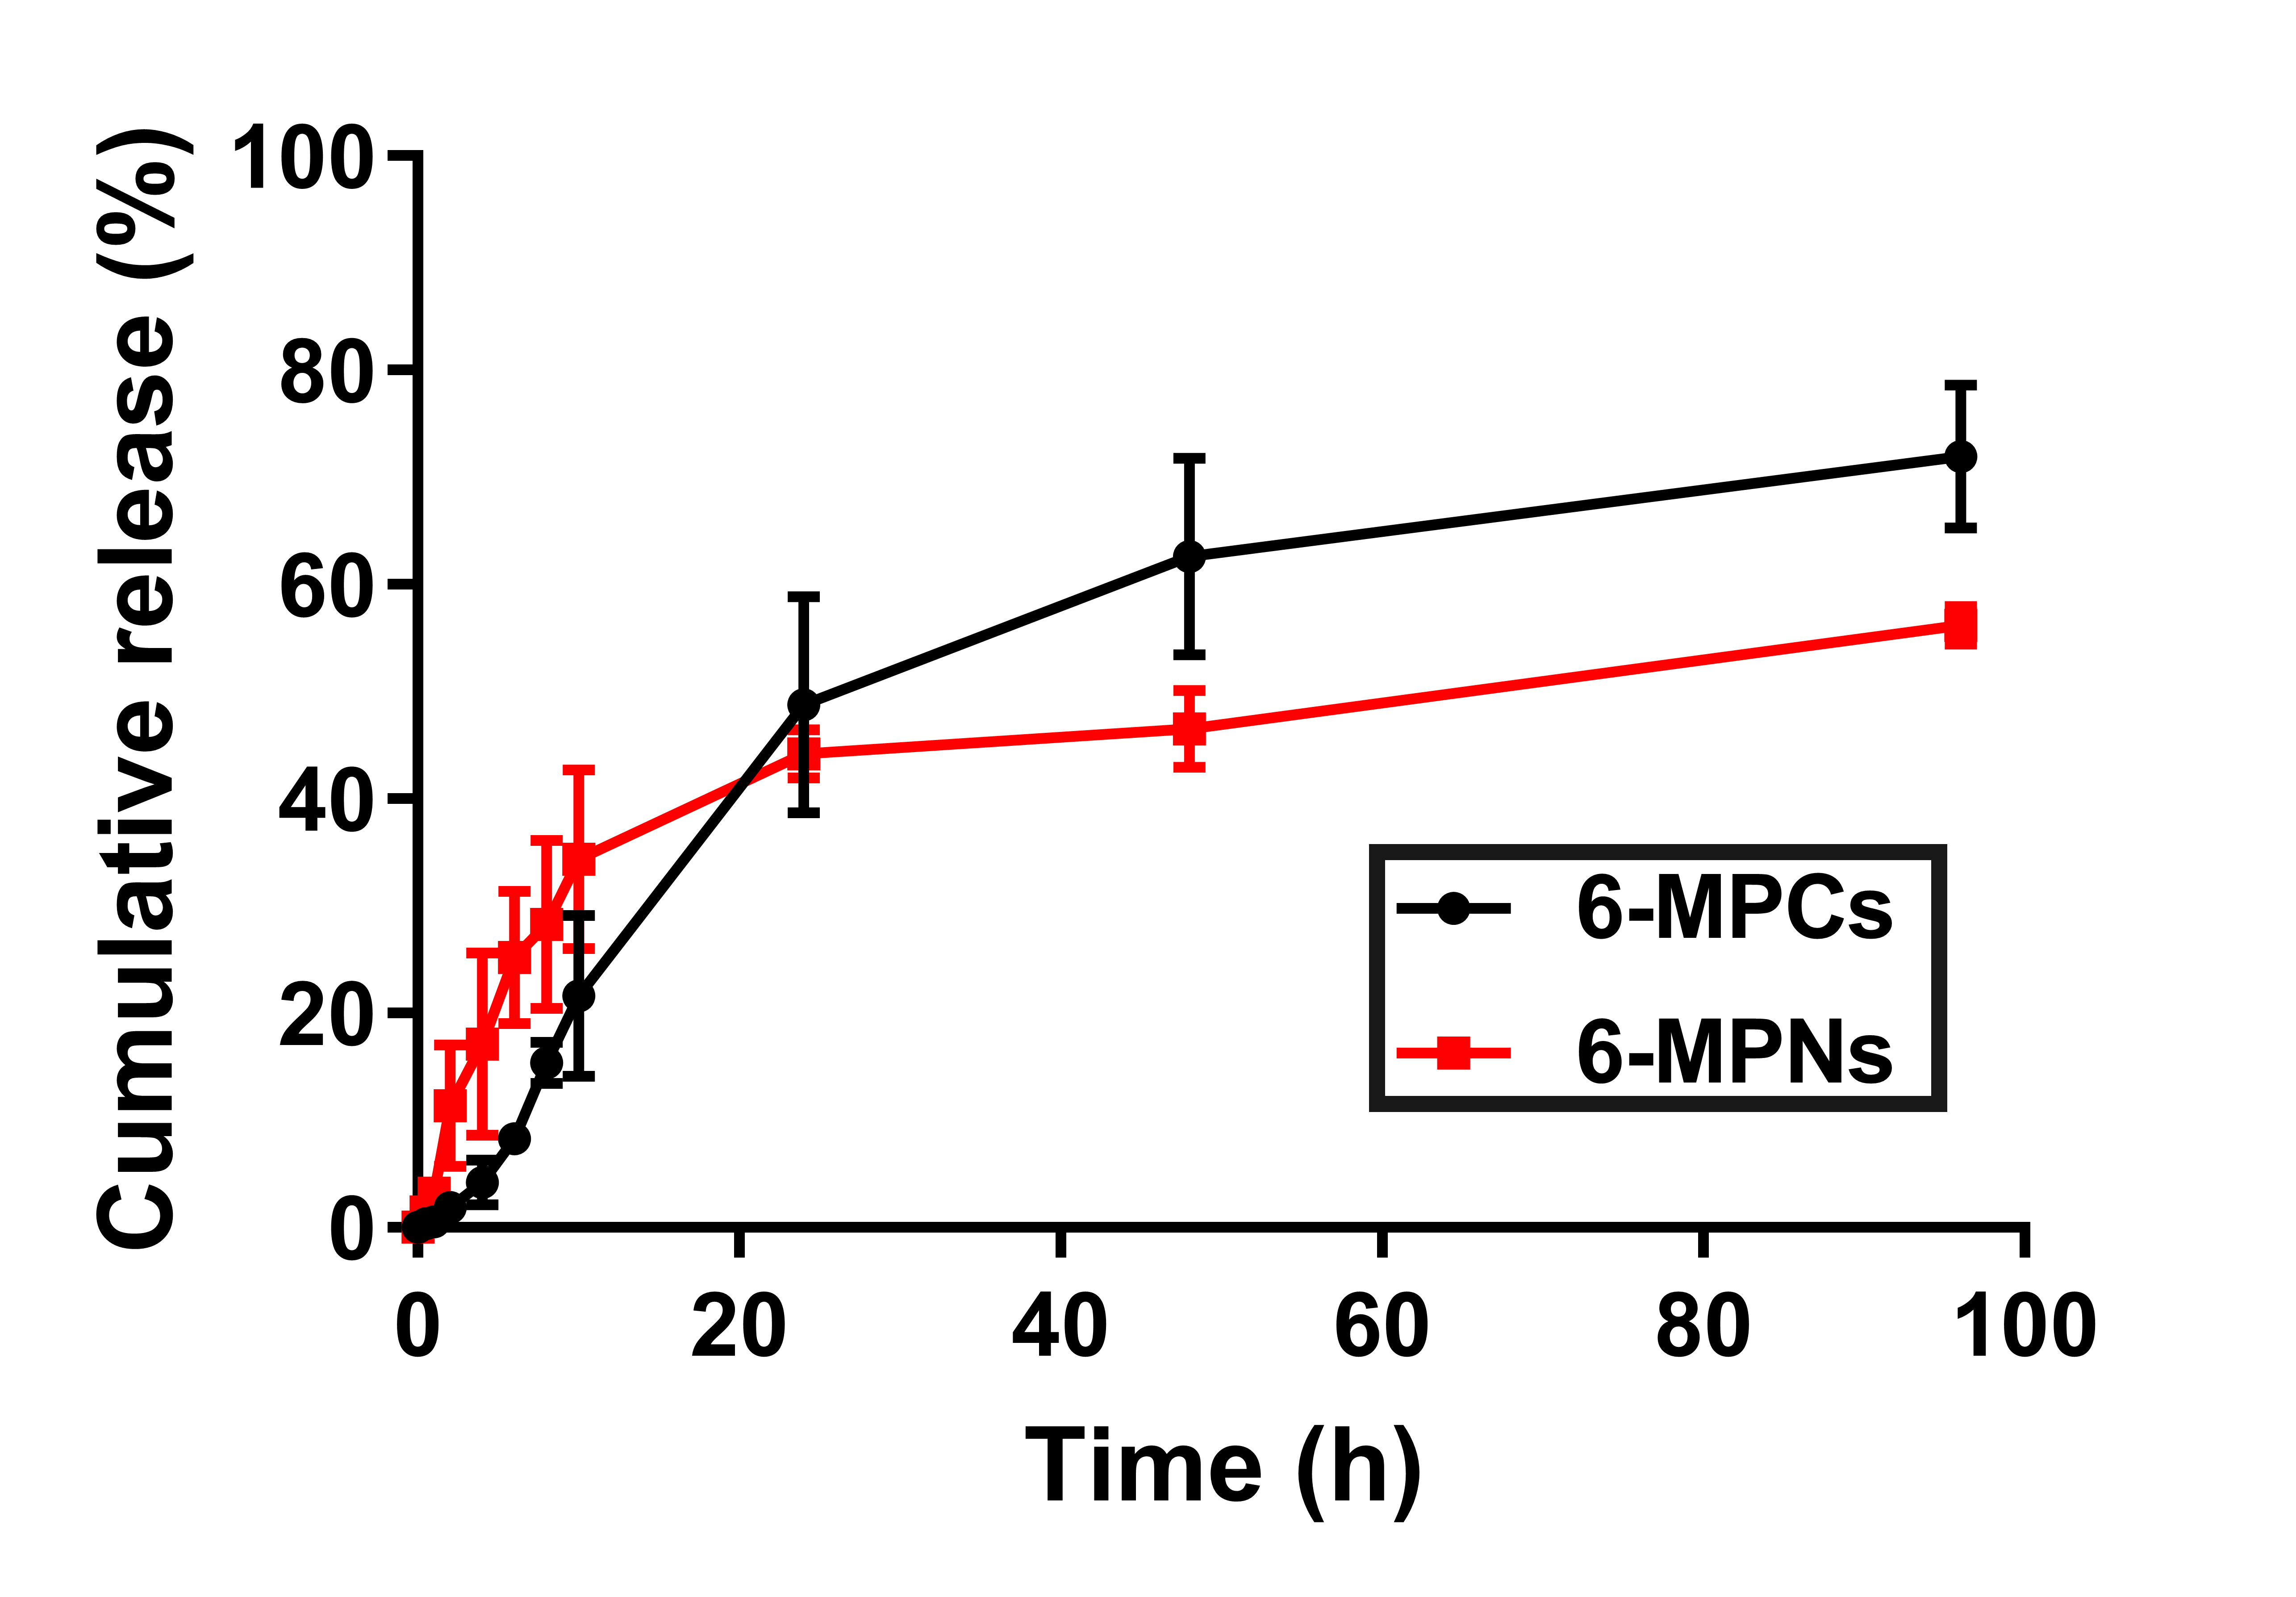


Figure S1: The drug release of 6-MP from nanomedicines and suspensions in PBS at pH 4.8.


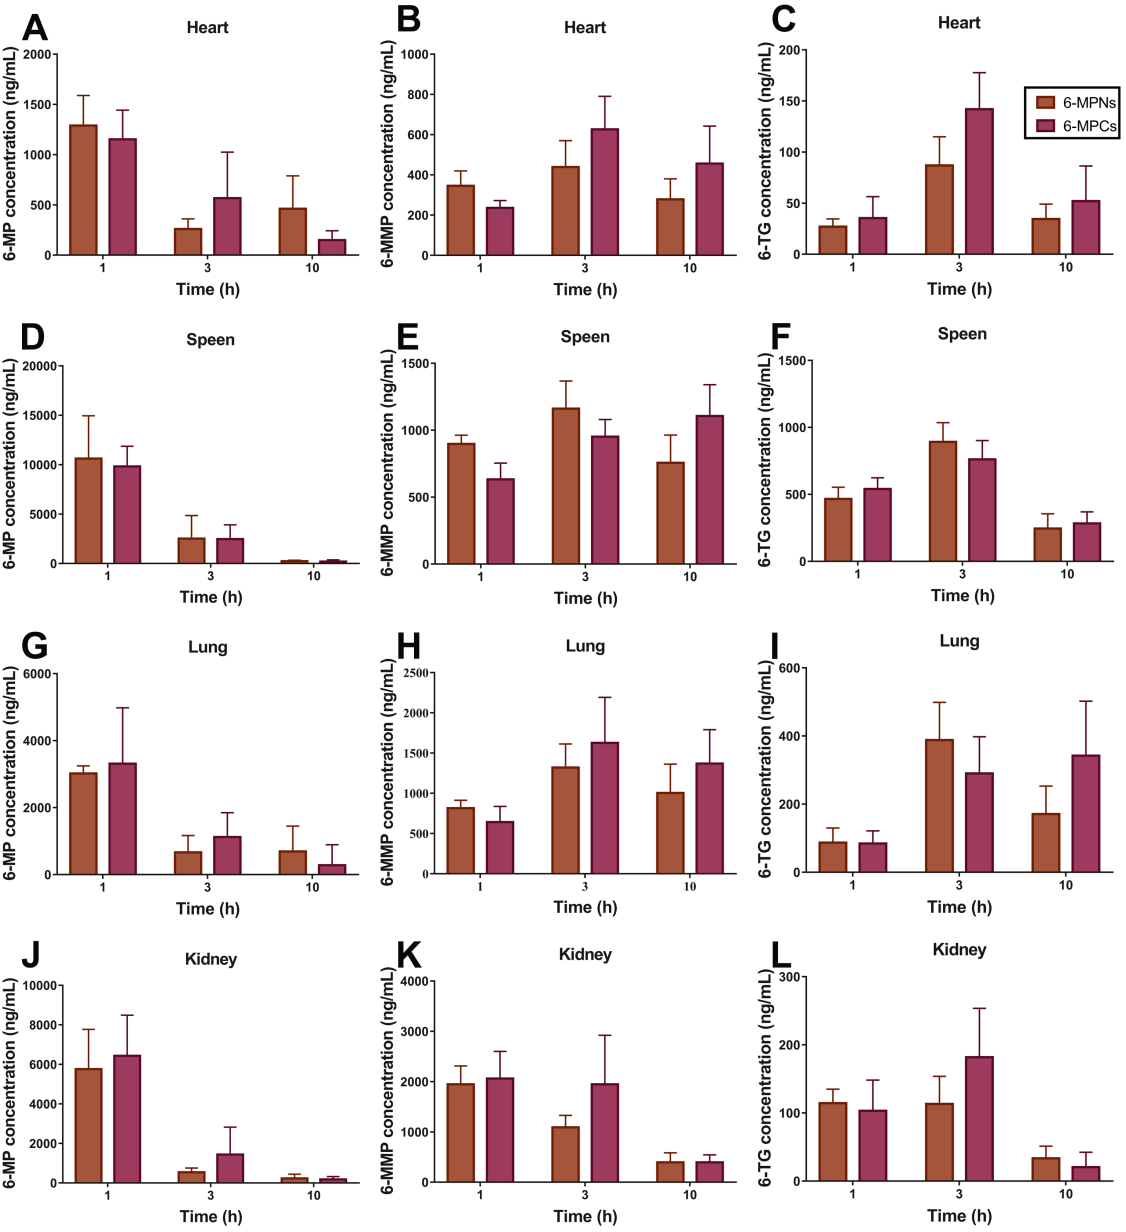


Figure S2: The concentration of 6-MP, 6-MMP, 6-TG in heart (A-C), spleen (D-F), lung (G-I) and kidney (J-L) after treatment with 15.75 mg/kg of 6-MPNs or 6-MPCs in SD rats (n = 6).
